## Connecting Patterns of Tumor Growth with Sex Differences in Extreme Survivorship for Primary Glioblastoma Patients

### Authors:

Paula Whitmire<sup>1</sup>, Cassandra R. Rickertsen<sup>1</sup>, Andrea Hawkins-Daarud<sup>1</sup>, Eduardo Carrasco Jr<sup>1</sup>, Julia Lorence<sup>1,2</sup>, Gustavo De Leon<sup>1</sup>, Lee Curtin<sup>1,3</sup>, Spencer Bayless<sup>1</sup>, Kamala Clark-Swanson<sup>1</sup>, Noah C. Peeri<sup>4</sup>, Christina Corpuz<sup>5</sup>, Christine Paula Lewis-de los Angeles<sup>6</sup>, Bernard R. Bendok<sup>1,7</sup>, Luis Gonzalez-Cuyar<sup>8</sup>, Sujay Vora<sup>9</sup>, Maciej Mrugala<sup>10</sup>, Leland S. Hu<sup>11</sup>, Lei Wang<sup>12</sup>, Alyx Porter<sup>10</sup>, Priya Kumthekar<sup>13</sup>, Sandra K. Johnston<sup>1,14</sup>, Kathleen M. Egan<sup>4</sup>, Robert Gatenby<sup>15</sup>, Peter Canoll<sup>16</sup>, Joshua B. Rubin<sup>17\*</sup>, Kristin R. Swanson<sup>1\*</sup>

\*contributed equally

<sup>1</sup>Precision Neurotherapeutics Innovation Program, Mayo Clinic, Phoenix, AZ, USA

<sup>2</sup>School of Life Sciences, Arizona State University, Tempe, AZ, USA

<sup>3</sup>Centre for Mathematical Medicine and Biology, University of Nottingham, Nottingham, UK

<sup>4</sup>Cancer Epidemiology Program, Moffitt Cancer Center, Tampa, FL, USA

<sup>5</sup>Department of Neurology, Columbia University Medical Center, New York, NY, USA

<sup>6</sup>Northwestern University Interdepartmental Neuroscience Program, Northwestern University Feinberg School of Medicine, Chicago, IL, USA

<sup>7</sup>Department of Neurologic Surgery, Mayo Clinic, Phoenix, AZ, USA

<sup>8</sup>Department of Pathology, Division of Neuropathology, University of Washington, Seattle, WA, USA

<sup>9</sup>Department of Radiation Oncology, Mayo Clinic, Phoenix, AZ, USA

<sup>10</sup>Department of Neurology, Mayo Clinic, Phoenix, AZ, USA

<sup>11</sup>Department of Radiology, Mayo Clinic, Phoenix, AZ, USA

<sup>12</sup>Department of Radiology, Feinberg School of Medicine, Northwestern University, Chicago, IL, USA

<sup>13</sup>Department of Neurology, Robert H Lurie Comprehensive Cancer Center, Northwestern University Feinberg School of Medicine, Chicago, IL, USA

<sup>14</sup>Department of Radiology, University of Washington, Seattle, WA, USA

<sup>15</sup>Cancer Biology and Evolution Program, Moffitt Cancer Center, Tampa, FL, USA

<sup>16</sup>Division of Neuropathology, Department of Pathology and Cell Biology, Columbia University School of Medicine, New York, NY, USA

<sup>17</sup>Department of Pediatrics, Washington University School of Medicine, St Louis, MO, USA

**Funding:** James S. McDonnell Foundation

**Purpose:** Patient sex is recognized as a significant determinant of outcome but the relative prognostic importance of molecular, imaging, and other clinical features of GBM has not yet been thoroughly explored for male versus female patients. Combining multi-modal MR images and patient clinical information, this investigation assesses which pretreatment MRI-based and clinical variables impact sex-specific survivorship in glioblastoma patients.

**Methods:** We considered the multi-modal MRI and clinical data of 494 patients newly diagnosed with primary glioblastoma (299 males and 195 females). Patient MR images (T1Gd, T2, and T2-FLAIR) were segmented to quantify imageable tumor volumes for each MR sequence. Cox proportional hazard (CPH) models and Student's t-tests were used to assess which variables were significantly associated with survival outcomes. We used machine learning algorithms to develop pruned decision trees to integrate the impact of these variables on patient survival.

**Results:** Among males, tumor (T1Gd) radius was a significant predictor of overall survival (HR=1.027,  $p=0.044$ ). Among females, higher tumor cell net invasion rate was a significant detriment to overall survival (HR=1.011,  $p<0.001$ ). Female extreme survivors had significantly smaller tumors (T1Gd) ( $p=0.010$  t-test), but tumor size was not significantly correlated with female overall survival ( $p=0.955$  CPH). Both male and female extreme survivors had significantly lower tumor cell net proliferation rates than patients in other survival groups (M  $p=0.004$ , F  $p=0.001$ , t-test). Age at diagnosis was a significant predictive factor for overall survival length for both males and females (M HR= 1.030, F HR=1.022). Additional variables like extent of resection, tumor laterality, and IDH1 mutation status were also found to have sex-specific effects on overall survival.

**Conclusion:** The results indicated that some variables, like the tumor cell diffuse invasion rate and tumor size, had sex-specific implications for survival, while other variables, such as age at diagnosis and tumor cell proliferation rate, impacted both sexes in the same way. Despite similar distributions of the MR imaging parameters between males and females, there was a sex-specific difference in how these parameters related to outcomes. The sex differences in the predictive value of these and other variables emphasizes the importance of considering sex as a biological factor when determining patient prognosis and treatment approach.

## **Introduction**

Glioblastoma (GBM) is the most common primary malignant brain tumor, with a median overall survival of 9 to 15 months, depending on the given course of treatment<sup>(1)(2)(3)</sup>. According to Ostrom et al.<sup>(4)</sup>, only 35% of patients survive more than one year and 4.7% of patients survive more than five years after diagnosis. Factors such as age at diagnosis, Karnofsky performance score (KPS), extent of surgical resection, and tumor location have been found to play a significant role in determining the duration of patient survival<sup>(5)(6)(7)</sup>, but there is still limited insight into which underlying biological features contribute to a patient becoming a “survival outlier.” To date, there is minimal research on the utility of using pretreatment (pre-tx), image-based volumetric and kinetic variables to identify potential extreme and short-term survivors. Additionally, while it has been consistently identified that GBM incidence is higher among males<sup>(8)(9)(10)(11)(12)</sup> and females GBM patients have better outcomes<sup>(8)(13)(14)(12)</sup>, little to no research has focused on sex-specific predictors of extreme and short-term survival. The ability to pinpoint relevant predictors of the duration of overall survival has clinical value and identifies areas for future research. By using variables derived from patient clinical information and routinely-obtained, non-invasive MR images, we can establish predictors of survival duration that can be readily assessed in a pre-tx setting. Knowing whether these factors affect males and females in the same way will guide research efforts towards best-practice, individualized patient care.

The purpose of this study was to determine whether there are sex-specific predictors of survival outcomes among glioblastoma patients. Using patient data from our multi-institutional brain tumor repository, we tested the significance of eight pre-tx volumetric, kinetic, and clinical variables in predicting extreme and short-term survival. We also tested whether these variables and additional categorical variables, including tumor laterality, extent of resection (EOR), isocitrate dehydrogenase 1 (IDH1) mutation status, and O(6)-methylguanine-DNA methyltransferase promoter (MGMT) methylation status, significantly impacted the overall survival of male and female patients. Throughout the analysis, males and females were tested separately as distinct population groups and their results were compared, allowing us to identify sex-specific impactors of survival outcome among GBM patients.

## **Methods**

### **Imaging**

As described in Swanson et al.<sup>(15)</sup>, tumor volumes were segmented from MR images [gadolinium-enhanced T1-weighted (T1Gd), T2-weighted (T2), and T2 fluid-attenuated inversion recovery (FLAIR)] by trained individuals using our in-house thresholding-based software. These volumes were converted to their spherically-equivalent radii for further analysis.

### **Biomathematical Models and Patient-Specific Tumor Kinetics**

An extensive literature has been generated over the last two decades applying a biomathematical model to simulate patient-specific glioblastoma growth<sup>(16)(17)(18)(15)</sup>. The primary model is referred to as the Proliferation-Invasion (PI) model and is based on two key parameters: the net rate of proliferation,  $\rho$ , and the net rate of invasion,  $D$ . By assuming that the T1Gd abnormality coincides with one threshold of tumor cell density relative to the maximum carrying capacity, and the T2 or T2-FLAIR (T2/FLAIR) abnormality coincides with another, lower threshold, one can obtain patient-specific estimates of these two parameters using standard pre-tx imaging<sup>(19)</sup>. This calibration uses two sets of MRI data: one set consists of two pre-tx time points of either T1Gd or T2/FLAIR images and the second set consists of one time point with both T1Gd and T2/FLAIR images. The first set is used to calculate a velocity and the second set is used to estimate the degree of invasion. These estimates have been shown to be prognostic of benefit from resection<sup>(18)</sup>, survival<sup>(16)</sup>, and radiation efficacy<sup>(20)</sup> and can be used to examine therapeutic response<sup>(21)(22)</sup>.

However, two pre-tx time points of imaging are not always available, necessitating the use of a second mathematical model. This mathematical model incorporates hypoxia, necrosis, and the angiogenic cascade and is referred to as the Proliferation-Invasion-Hypoxic-Necrotic-Angiogenesis (PIHNA) model<sup>(23)</sup>. This model

similarly relies on an analogous net rate of invasion and net rate of proliferation. In this calibration approach, the relative size of necrosis is used as a surrogate to the velocity estimate from the two time points of imaging. For this calibration method, a lookup table was created, with each entry being an output from a unique  $D$  and  $q$  PIHNA simulation. The lookup table contains the estimated  $PI D/q$  value, the size of necrosis, the T1Gd visible portion of the tumor (assumed at  $>80\%$  cell density) and the T2/FLAIR visible portion (assumed at  $>16\%$  cell density), throughout each simulation. Given a patient's T1Gd volume, T2/FLAIR volume, necrosis size, and the  $PI$  estimated  $D/q$  at one time point, the lookup table points to a sub-table of simulation points that match the T2/FLAIR size on MRI within a small measurement tolerance. A  $D$  and  $q$  is then chosen based on the simulations that match the  $PI D/q$  and necrosis size within a small tolerance. If multiple  $D q$  pairs exist that satisfy the aforementioned criteria, the pair that minimizes the T1Gd size is chosen. As a number of the patients in our cohort were not eligible for the traditional calibration method, we elected to use this method for all patients. Thus, in this paper, when the parameter  $D$  or  $q$  is discussed, it is the  $D$  and  $q$  corresponding to the PIHNA calibration.

### Patient Population

Our research lab has amassed a large multi-institutional repository over the last 15 years under institutional review board approvals. The repository consists of the clinical patient data (curated from medical records) and serial, multi-modal MR images of over 1400 glioblastoma patients. From this repository, we identified all newly-diagnosed glioblastoma patients with necessary clinical information (sex, age, and overall survival) and a calculated pre-tx (prior to biopsy or resection) tumor volume from a T1Gd MRI. This cohort was comprised of 494 primary GBM patients (299 males and 195 females). All patients in this cohort were adults at time of diagnosis, with the exception of three adolescent patients (2 male and 1 female). Since the calculation of PIHNA  $D$ , PIHNA  $q$ , and  $PI D/q$  requires both T1Gd and T2/FLAIR images, a sub-cohort of patients with sufficient imaging was created from the main cohort in order to study the effect of these variables on survival (223 males and 141 females).

We defined extreme survivors (EXS) as those with overall survival (OS) of 5 years (1825 days) or longer. EXS typically make up less than 5% of glioblastoma patients<sup>(4)</sup>. However, due to the data collection efforts of a multicenter collaboration researching extreme survival among GBM patients (ENDURES), about 9.5% of patients in this cohort were EXS. EXS were compared to Non-EXS, which consisted of all patients who survived less than 5 years. For further comparison, we identified patients from our cohort that were short-term survivors (STS), which we defined as patients with a confirmed death and an overall survival shorter than 7 months (210 days)<sup>(24)</sup>. STS were compared to Non-STs, which consisted of all patients who survived longer than 7 months.

The breakdown of the main cohort and the sub-cohort by sex and survival group is shown in **table 1**.

|                                    | Volumetric and Clinical Data<br>(Main cohort) N=494 |             | PI and PIHNA<br>(Sub cohort)<br>N = 364 |             |
|------------------------------------|-----------------------------------------------------|-------------|-----------------------------------------|-------------|
|                                    | Male                                                | Female      | Male                                    | Female      |
| <b>All Patients</b>                | 299 (60.5%)                                         | 195 (39.5%) | 223 (61.2%)                             | 141 (38.7%) |
| <b>Extreme (OS&gt;1825 days)</b>   | 30 (63.8%)                                          | 17 (36.2%)  | 26 (70.3%)                              | 11 (29.7%)  |
| <b>Short term (OS&lt;210 days)</b> | 46 (52.3%)                                          | 42 (47.7%)  | 32 (50%)                                | 32 (50%)    |

**Table 1: Breakdown of the main cohort and sub-cohort by sex and survival group.** Percentages indicate the distribution of males and females in each survival group.

## Statistical analysis

**Table 2** outlines the eight quantitative volumetric, kinetic, and clinical variables that were explored in our investigation. Student's t-tests with Welch's corrections were used to test whether there were significant differences in the eight quantitative variables between the following survival groups: EXS vs Non-EXS, EXS vs STS, and STS vs Non-STS. Cox-Proportional Hazards models (CPH) were used to assess which of the quantitative variables were significant predictors of OS. Parameters that were significant or almost significant ( $p < 0.10$ ) in univariate analysis were compared in multivariate analysis. Kaplan-Meier survival analysis (log-rank tests) and CPH models were used to assess the impact of the categorical variables on survival. The following categorical variables were included: IDH1 mutation status, MGMT methylation status, tumor laterality, and EOR. T-tests and Kaplan-Meier survival curves were generated using Prism<sup>(25)</sup> and the CPH models were generated using R studio<sup>(26)</sup>. All statistical analyses were performed separately for the male and female populations. There was no significant difference in the distribution or mean values of these variables between males and females (**Supplement 11**).

| Variable used for Investigation        | Definition                                                                                                                                                                      | Male  |        |            | Female |        |            |
|----------------------------------------|---------------------------------------------------------------------------------------------------------------------------------------------------------------------------------|-------|--------|------------|--------|--------|------------|
|                                        |                                                                                                                                                                                 | Mean  | Median | Range      | Mean   | Median | Range      |
| Age (years)                            | Age of patient on date of diagnosis                                                                                                                                             | 57.58 | 58     | 12-95      | 58.41  | 60.5   | 9-96       |
| T1Gd Radius (mm)                       | Combined volume of the central non-enhancing necrotic region and surrounding enhanced region of tumor in a pre-tx T1Gd MR image (converted to a spherically- equivalent radius) | 19.52 | 20.10  | 3.04-33.61 | 19.27  | 18.99  | 4.61-35.08 |
| Necrosis Radius (mm)                   | Volume of non-enhancing central necrotic region in a pre-tx T1Gd MR image (converted to a spherically- equivalent radius)                                                       | 11.39 | 11.69  | 0.00-26.54 | 11.37  | 11.33  | 0.00-27.06 |
| Contrast-enhancing (CE) thickness (mm) | Average linear thickness of the contrast-enhancing region in a pre-tx T1Gd MR image (calculated as the difference between the T1Gd radius and the necrosis radius)              | 8.16  | 7.85   | 2.55-18.94 | 7.89   | 7.59   | 0.32-23.26 |
| T2 /FLAIR radius (mm)                  | Volume of the pre-tx T2 or T2-FLAIR MR image (converted to a spherically- equivalent radius)                                                                                    | 27.11 | 28.31  | 9.94-39.55 | 26.98  | 27.86  | 9.99-42.81 |
| PIHNA D (mm <sup>2</sup> /year)        | Net tumor cell diffuse invasion rate                                                                                                                                            | 32.34 | 28.99  | 1.45-145.3 | 36.25  | 23.03  | 0.37-289.9 |

|                                       |                                   |       |       |              |       |       |              |
|---------------------------------------|-----------------------------------|-------|-------|--------------|-------|-------|--------------|
| PIHNA $\rho$<br>(year <sup>-1</sup> ) | Net tumor cell proliferation rate | 65.88 | 18.25 | 1.83-1825    | 82.40 | 18.25 | 1.83-1825    |
| PI D/ $\rho$<br>(mm <sup>2</sup> )    | Relative tumor invasiveness       | 2.19  | 1.65  | 0.0034-10.26 | 2.12  | 1.28  | 0.0034-10.70 |

**Table 2: Definitions and distributions of the eight quantitative volumetric, kinetic, and clinical variables used in this investigation**

### Decision Trees

The decision trees (DT) in this study were created using R<sup>(26)</sup>, accompanied by a package called *rpart*<sup>(28)</sup>, which allows effective decision tree pruning. Six DT were produced in total, grouped into 3 pairs. The first pair of DT sorted EXS and Non-EXS, the second pair sorted EXS and STS, and the third pair sorted STS and Non-STS. Within each pair, one tree was created using the male population and the other was created using the female population. All six trees were constructed using the eight quantitative pre-tx variables: age, T1Gd radius, necrosis radius, CE thickness, T2/FLAIR radius, PIHNA D, PIHNA  $\rho$ , and PI D/ $\rho$ . The PI and PIHNA subcohort of patients (223 males and 141 females) were used to create the testing and training groups. 70% of the each population was placed in the training set and 30% in the testing set and 10-fold cross validation was used to ensure the generalizability of the results. For each tree, accuracy is reported for the training group, testing group, and the full cohort (training + testing). For the EXS vs Non-EXS and STS vs Non-STS trees, EXS and STS were considered the condition positive groups, respectively, and the sensitivity was reported for the testing group, training group, and full cohort.

### Results

#### Variables associated with extreme and short-term survival

Student's t-tests were performed separately on males and females and compared the following groups: EXS vs Non-EXS, EXS vs STS, and STS vs Non-STS. The results of this analysis can be found in **Table 3**.

When compared to the rest of the male population, EXS were significantly younger ( $p=0.005$ ) and STS were significantly older ( $p<0.001$ ). Male EXS, with a mean age of 51.33 years, were significantly younger than male STS, who had a mean age of 65.33 years ( $p<0.001$ ). Additionally, male STS had significantly larger T1Gd radii compared to male EXS ( $p=0.041$ ) and male Non-STS ( $p=0.011$ ). However, there was no significant difference in T1Gd radii between male EXS and male Non-EXS ( $p=0.485$ ). Male STS also had significantly larger CE thickness when compared to male Non-STS ( $p=0.031$ ). Male STS had significantly larger D than male Non-STS ( $p=0.017$ ), with no difference between the D of male EXS and the D of male Non-EXS ( $p=0.992$ ). For  $\rho$ , male EXS had significantly smaller  $\rho$  when compared to male Non-EXS ( $p=0.004$ ) and when compared to male STS ( $p=0.047$ ).

When compared to the rest of the female population, female EXS were significantly younger ( $p=0.032$ ) while female STS were significantly older ( $p<0.001$ ). The mean age for female EXS was 48.29 years, which was significantly younger than the mean age for female STS, 65.26 years ( $p=0.003$ ). Female EXS had significantly smaller T1Gd radii compared to female Non-EXS ( $p=0.010$ ) and female STS ( $p=0.010$ ). Female STS did not have significantly different T1Gd radii compared to female Non-STS ( $p=0.307$ ). Compared to the rest of the female population, female EXS had significantly smaller D ( $p=0.008$ ) and female STS had significantly larger D ( $p=0.018$ ). Female EXS had significantly smaller  $\rho$  compared to female Non-EXS ( $p=0.001$ ) and female STS ( $p=0.027$ ). There was no significant difference in  $\rho$  between female STS and female Non-STS ( $p=0.535$ ).

| Covariate       | EXS vs Non-EXS | EXS vs STS | STS vs Non-STS |
|-----------------|----------------|------------|----------------|
| Age             |                |            |                |
| Necrosis radius |                |            |                |
| T1Gd radius     |                |            |                |
| CE thickness    |                |            |                |
| T2/FLAIR radius |                |            |                |
| PIHNA D         |                |            |                |
| PIHNA $\rho$    |                |            |                |
| PI D/ $\rho$    |                |            |                |

**Table 3: Results of the t-test comparisons of the eight quantitative volumetric and clinical variables between the survival groups for males and females.** Purple boxes indicate that the means of the variables were significantly different between the survival groups within both the male and female populations. Red boxes indicate a significant difference within the female population and blue indicate a significant difference within the male population. Gray boxes indicate that neither population showed a significant difference in the means of the variables between the survival groups. Detailed results of t-tests can be found in **Supplement 13**.

### Decision Trees

The six decision trees used in this analysis were constructed using the following pre-tx variables: age, T1Gd radius, necrosis radius, CE thickness, T2/FLAIR radius, PIHNA D, PIHNA  $\rho$ , and PI D/ $\rho$ .

In the female EXS vs Non-EXS DT, the nodes that predicted EXS with 100% sensitivity included T1Gd radius < 21.93 mm, necrosis radius < 8.68 mm, and age < 28.5 years. For males, the best predictors of EXS included CE thickness < 11.33 mm, PI D/ $\rho$   $\geq$  0.3687 mm<sup>2</sup>, age < 72 years, and age < 59.5 years. Notably, all male EXS had CE thickness shorter than 11.33 mm, PI D/ $\rho$  above 0.3687 mm<sup>2</sup>, and age below 72 years. **Figure 1** shows the female and male pruned DT that sort patients into EXS and Non-EXS survival categories.

## Female EXS vs Non-EXS

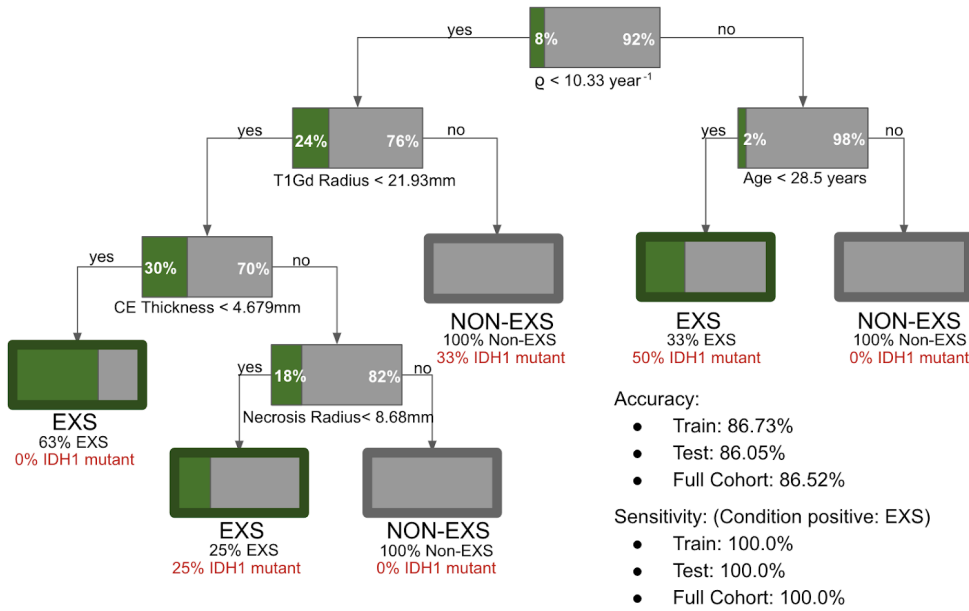

## Male EXS vs Non EXS

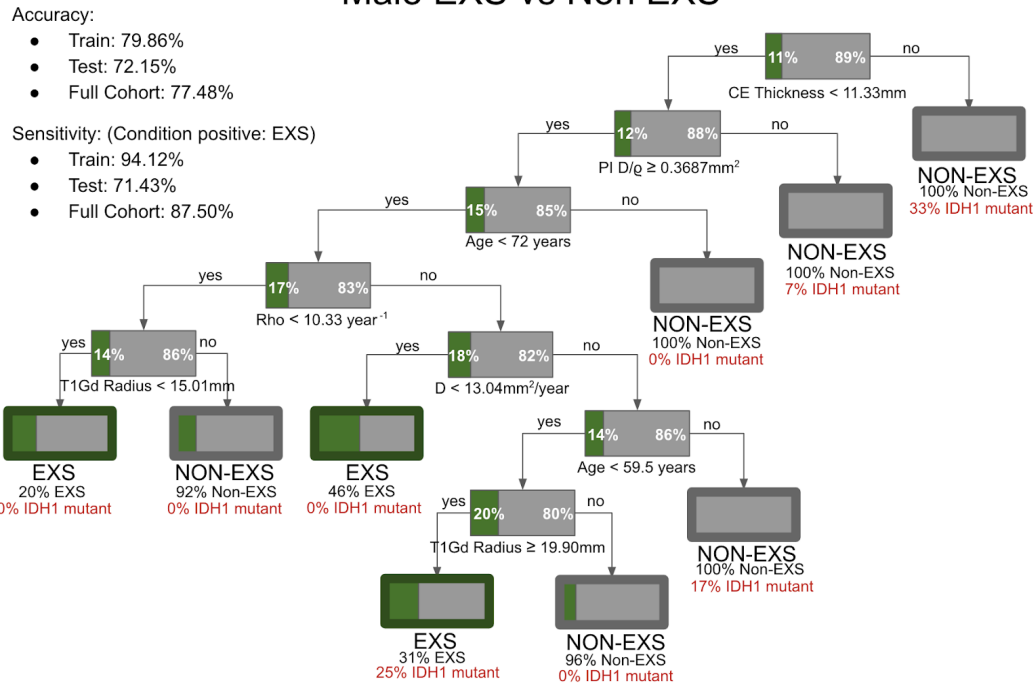

**Figure 1: Female and male EXS vs Non-EXS DT.** At each node, color (green for EXS and gray for Non-EXS) and percentages indicate concentration of EXS and Non-EXS. Percentages in red indicate concentration of IDH1 mutant patients at each endpoint.

In the female EXS vs STS DT, the nodes that best predicted female EXS were  $\rho < 10.33 \text{ year}^{-1}$ , CE thickness  $< 4.746 \text{ mm}$ , and age  $< 47.5 \text{ years}$  and the node that best predicted female STS was age  $\geq 47.5 \text{ years}$ . In the male DT, the node that best predicted EXS was  $\rho < 118.2 \text{ year}^{-1}$  and the node that best predicted STS was  $D \geq 11.85 \text{ mm}^2/\text{year}$ . **Figure 2** shows the female and male DT that sort patients into EXS and STS.



## Female EXS vs STS

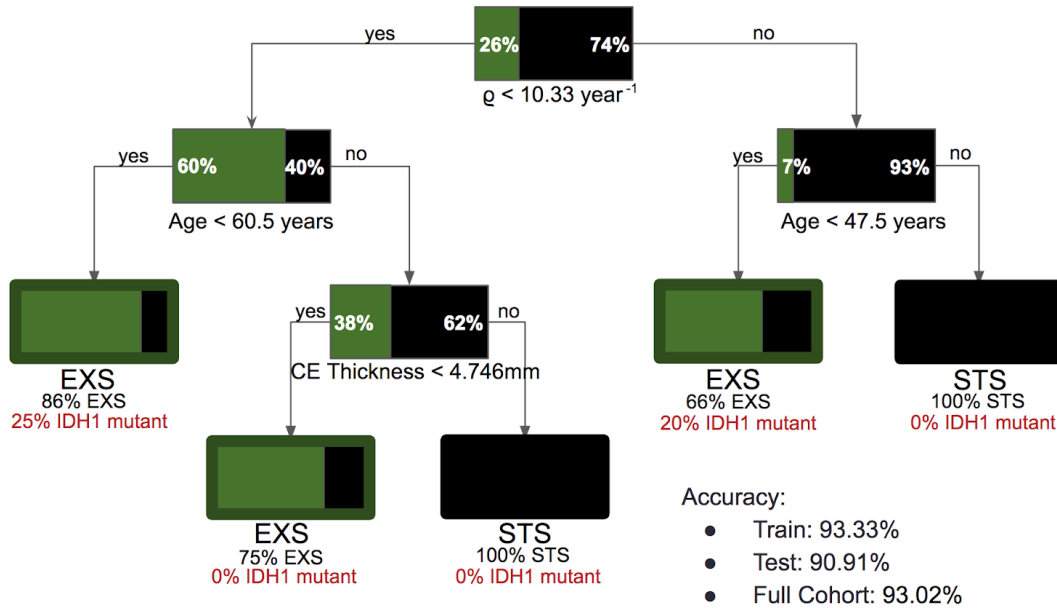

## Male EXS vs STS

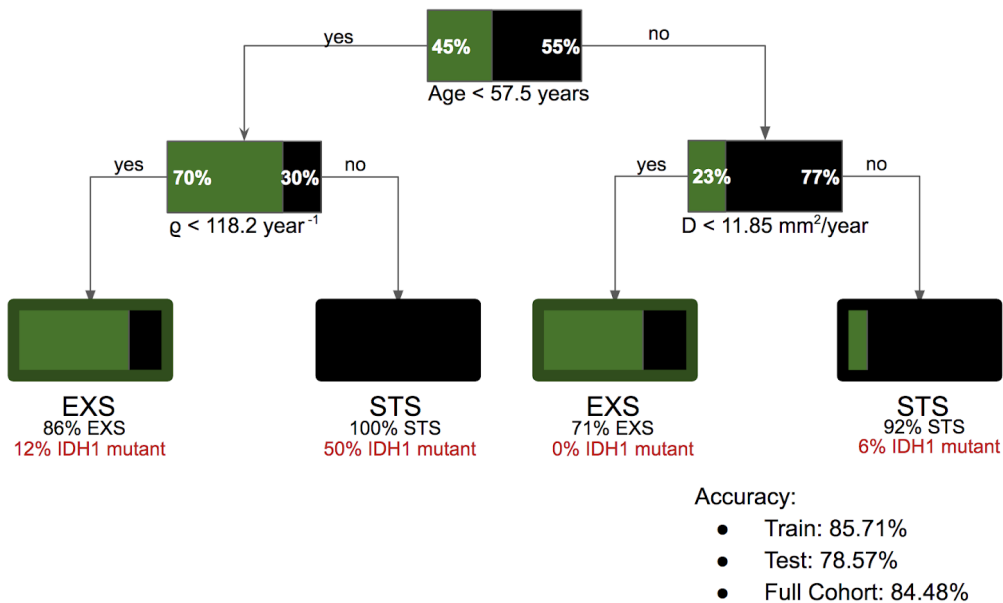

**Figure 2: Female and male EXS vs STS DT.** At each node, color (green for EXS and black for STS) and percentages indicate concentration of EXS and STS. Percentages in red indicate concentration of IDH1 mutant patients at each endpoint.

The third pair of DT sorted males and females into STS and Non-STS groups. Among females, the nodes that best predicted STS included age  $\geq 49.5$  years, T2/FLAIR radius  $\geq 23.76$  mm, and D  $\geq 41.23$  mm<sup>2</sup>/year. In the male DT, the nodes that most accurately predicted STS were age  $\geq 47.5$  years, age  $\geq 79.5$  years,  $q \geq 10.33$  year<sup>-1</sup>, and CE thickness between 11.25 mm and 12.36 mm. **Figure 3** shows the female and male STS vs Non-STS DT.

## Female STS vs Non STS

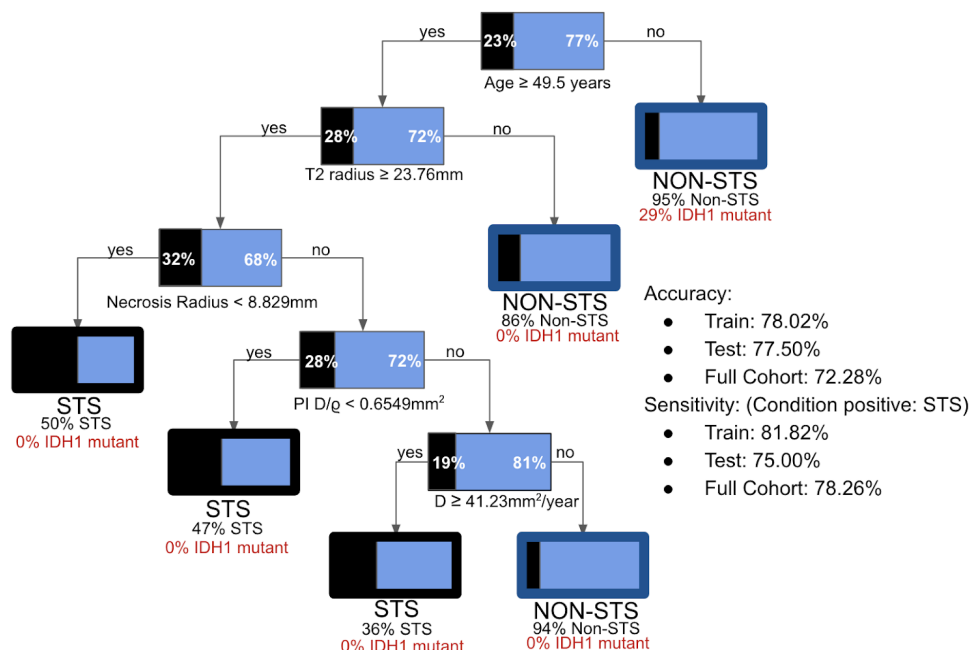

## Male STS vs Non STS

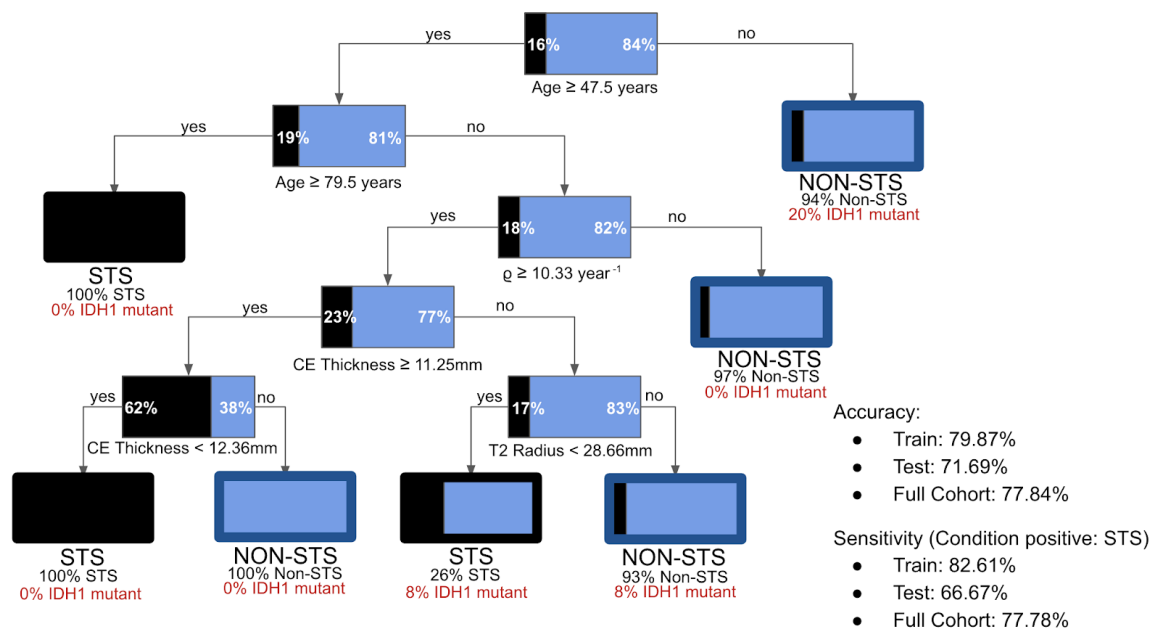

**Figure 3: Female and male STS vs Non-STS DT.** At each node, color (black for STS and blue for Non-STS) and percentages indicate concentration of STS and Non-STS. Percentages in red indicate concentration of IDH1 mutant patients at each endpoint.

### Variables associated with overall survival

Univariate and multivariate CPH analyses were utilized to determine which variables significantly influenced the overall survival of GBM patients. Variables that were significant or almost significant ( $p < 0.10$ ) in univariate analysis were analyzed in multivariate analysis.

In the male univariate CPH (**Table 4A**), factors with significant prognostic value included: age ( $HR=1.027$ ,  $p < 0.001$ ), PI D/q ( $HR=0.932$ ,  $p=0.038$ ) and T1Gd radius ( $HR=1.024$ ,  $p=0.025$ ). PIHNA  $\rho$

(HR=1.001,  $p=0.064$ ) was almost significant ( $p<0.10$ ). After multivariate CPH analysis, factors found to independently influence survival for males included: age (HR=1.030,  $p<0.001$ ) and T1Gd radius (HR=1.027,  $p=0.044$ ).

Factors with significant prognostic value in the female univariate CPH (**Table 4B**) analysis included: age (HR=1.028,  $p<0.001$ ), T1Gd radius (HR=1.026,  $p=0.048$ ), and PIHNA D (HR=1.011,  $p<0.001$ ). PIHNA  $\rho$  (HR=1.001,  $p=0.052$ ) was almost significant ( $p<0.10$ ). In multivariate CPH analysis, age (HR=1.021,  $p=0.006$ ) and PIHNA D (HR=1.011,  $p<0.001$ ) were identified as significant independent prognostic factors for females.

| Males           | Univariate |             |                  | Multivariate |             |                  |
|-----------------|------------|-------------|------------------|--------------|-------------|------------------|
|                 | Covariate  | HR          | 95% CI           | p-value      | HR          | 95% CI           |
| Age             | 1.027      | 1.018-1.037 | <b>&lt;0.001</b> | 1.030        | 1.017-1.044 | <b>&lt;0.001</b> |
| Necrosis radius | 1.018      | 0.996-1.040 | 0.118            |              |             | N/A              |
| T1Gd radius     | 1.024      | 1.003-1.046 | <b>0.025</b>     | 1.027        | 1.001-1.054 | <b>0.044</b>     |
| CE Thickness    | 1.028      | 0.989-1.068 | 0.161            |              |             | N/A              |
| T2/FLAIR radius | 0.996      | 0.972-1.020 | 0.744            |              |             | N/A              |
| PIHNA D         | 1.003      | 0.997-1.010 | 0.266            |              |             | N/A              |
| PIHNA $\rho$    | 1.001      | 1.000-1.001 | 0.064            | 1.000        | 0.999-1.001 | 0.637            |
| PI D/ $\rho$    | 0.932      | 0.872-0.996 | <b>0.038</b>     | 0.951        | 0.880-1.029 | 0.210            |

**Table 4A.**

| Females         | Univariate |             |                  | Multivariate |             |                  |
|-----------------|------------|-------------|------------------|--------------|-------------|------------------|
|                 | Covariate  | HR          | 95% CI           | p-value      | HR          | 95% CI           |
| Age             | 1.028      | 1.015-1.041 | <b>&lt;0.001</b> | 1.021        | 1.006-1.037 | <b>0.006</b>     |
| Necrosis radius | 1.017      | 0.991-1.042 | 0.204            |              |             | N/A              |
| T1Gd radius     | 1.026      | 1.000-1.052 | <b>0.048</b>     | 0.993        | 0.964-1.023 | 0.641            |
| CE Thickness    | 1.037      | 0.988-1.088 | 0.143            |              |             | N/A              |
| T2/FLAIR radius | 1.017      | 0.989-1.045 | 0.232            |              |             | N/A              |
| PIHNA D         | 1.011      | 1.006-1.016 | <b>&lt;0.001</b> | 1.011        | 1.005-1.017 | <b>&lt;0.001</b> |
| PIHNA $\rho$    | 1.001      | 1.000-1.002 | 0.052            | 1.000        | 0.999-1.002 | 0.801            |
| PI D/ $\rho$    | 0.996      | 0.937-1.059 | 0.906            |              |             | N/A              |

**Table 4B.**

**Table 4: Results of univariate and multivariate CPH analyses for males (A) and females (B).** Factors that were almost significant ( $p<0.10$ ) or significant in univariate analysis were included in the multivariate analysis.

## IDH1 Mutation

Since mutations of the isocitrate dehydrogenase 1 (IDH1) gene have been previously identified as significant predictors of long-term survival<sup>(14)</sup>, we analyzed the impact of sex and IDH1 status on the overall survival of our patient cohort. 120 patients in the main cohort had determined IDH1 status, consisting of 69 wild-type (wt) and 8 mutant (mut) male patients and 39 wt and 4 mut female patients. When looking at the entire population (both males and females), there was a trend towards IDH1 mutant patients having significantly better survival (log-rank,  $p=0.071$ ). Among females, IDH1 mut survived significantly longer than IDH1 wt patients (log-rank,  $p=0.008$ ), but among males, the survival difference was not significant (log-rank,  $p=0.924$ ) (**Supplement 1**). All 4 IDH1 mut females survived at least three years, making them all long-term survivors<sup>(29)</sup>.

We also assessed whether IDH1 mut patients had the same features as the extreme survivors in this analysis (younger age, lower PIHNA D, lower PIHNA  $\rho$ , and smaller T1Gd radii). Unlike the female EXS, IDH1 mut females did not have lower PIHNA D (t-test,  $p=0.402$ ) or smaller T1Gd radii ( $p=0.584$ ) compared to their wt counterparts, but they did have significantly lower PIHNA  $\rho$  when compared to wt females ( $p=0.027$ ). Males did not show significantly different PIHNA D ( $p=0.796$ ) or PIHNA  $\rho$  ( $p=0.461$ ) between the two IDH1 status groups, but IDH1 mut males did tend to have smaller T1Gd radii ( $p=0.052$ ) when compared IDH1 wt males. Both male and female IDH1 mut were significantly younger than their wt counterparts (Male  $p=0.024$ , Female  $p=0.007$ ).

## MGMT Methylation

Methylation of the O(6)-methylguanine-DNA methyltransferase (MGMT) promoter has been found to be significantly more common in long-term survivors<sup>(30)</sup>, so we also assessed the impact of MGMT methylation on the survival of our population cohort. Ninety patients from the main cohort had available MGMT methylation status, which comprised of 32 females (12 methylated and 20 unmethylated) and 58 males (18 methylated and 40 unmethylated). Methylated patients had significantly better survival than unmethylated patients among males (log-rank,  $p=0.013$ ), females ( $p=0.007$ ), and the entire population (males and females) ( $p<0.001$ ) (**Supplement 4**). Multivariate CPH analyses were performed to assess the impact of MGMT status on survival, while accounting for age. These analyses showed that MGMT status significantly impacted survival for males ( $p=0.004$ ) and females ( $p=0.037$ ). Among EXS with available MGMT methylation status ( $n=15$ ), 50% ( $n=5$ ) of males and 60% ( $n=3$ ) of females had MGMT methylation, while among Non-EXS ( $n=75$ ), 29% ( $n=14$ ) of males and 33% ( $n=9$ ) of females had MGMT methylation, suggesting that MGMT methylation was more common among both male and female EXS.

When we tested to see if MGMT methylated patients shared the features of extreme survivors (younger age, lower PIHNA D, lower PIHNA  $\rho$ , and smaller T1Gd radii), we found that MGMT methylated females had significantly lower  $\rho$  (t-test,  $p=0.026$ ) and tended to have lower D ( $p=0.057$ ) when compared to MGMT unmethylated females. There was no significant difference in the values of D ( $p=0.477$ ) or  $\rho$  ( $p=0.869$ ) between MGMT methylated and unmethylated males. For both males and females, there was no significant difference in age (Male  $p=0.724$ , Female  $p=0.735$ ) or T1Gd radii (Male  $p=0.397$ , Female  $p=0.241$ ) between methylated and unmethylated patients.

## Laterality

Using pre-tx T1Gd MR images, we determined the laterality of each patient's tumor, classifying the tumors as being located in the right hemisphere, left hemisphere, or both hemispheres (bilateral). The impact of tumor laterality on survival was assessed separately for males and females, and the results were compared. Among males, there were 129 left hemisphere GBMs, 154 right hemisphere GBMs, and 11 bilateral GBMs, and among females there were 86 left hemisphere GBMs, 96 right hemisphere GBMs, and 9 bilateral GBMs. Laterality could not be determined for 5 male and 4 female patients.

Males with GBMs in the left hemisphere had better survival outcomes than males with GBMs in the right hemisphere. Male patients with tumors on the left side trended towards significantly better survival than

males with tumors on the right side (log-rank,  $p=0.077$ ) and had significantly better survival than males with bilateral tumors ( $p=0.010$ ). In a multivariate CPH analysis that also accounted for extent of resection, tumor location in the left hemisphere was found to be a significant independent predictor of improved survival outcome for males ( $p=0.017$ ) (**Supplement 14**). There were more EXS than STS among males with tumors on the left side and there were almost twice as many STS as EXS among males with tumors on the right side. Laterality did not have a significant impact on survival for female patients. There was no significant difference in survival between females with left and right hemisphere tumors (log-rank,  $p=0.218$ ), and females with bilaterally located tumors did not have significantly worse survival when compared to females with non-bilateral tumors (bilateral vs left  $p=0.272$ , bilateral vs right  $p=0.471$ ) (**Supplement 6**). In CPH analysis, laterality was not a significant predictor of female survival ( $p=0.299$ ) (**Supplement 14**).

## Extent of Resection

Our investigation evaluated whether the extent of initial surgical intervention, a known prognostic factor among GBM patients, had the same prognostic value for both male and female GBM patients. Patient extent of resection (EOR) status, categorized as gross total resection (GTR), subtotal resection (STR), or biopsy, was obtained from the patient records. From the main cohort of 494 patients, 211 males (83 GTR, 83 STR, and 45 biopsy) and 136 females (54 GTR, 55 STR, and 27 biopsy) had available EOR status.

EOR had a significant impact on the survival of male GBM patients. In univariate CPH analysis, EOR was a significant independent predictor of overall survival in males ( $p=0.002$ ), with GTR being associated with the best survival outcomes (**Supplement 14**). In a Kaplan-Meier survival curve comparison, GTR males had significantly better survival than STR males (log-rank,  $p=0.033$ ) and males who received some surgical resection (GTR or STR) had significantly better survival than males who only received a biopsy ( $p=0.013$ ) (**Supplement 8**). Cochran-Armitage Trend Test showed that there was significant trend towards male EXS receiving more extensive resections and male STS receiving less extensive resections or biopsies ( $p=0.027$ ). Female who received resection (GTR or STR) trended towards improved survival compared to biopsy females (log-rank,  $p=0.077$ ) (**Supplement 8**), but there was no significant difference in survival between GTR females and STR females ( $p=0.992$ ) (**Supplement 9**). Additionally, EOR did not significantly impact female survival in univariate CPH analysis ( $p=0.180$ ) (**Supplement 14**). Trend test showed that there was a notable but insignificant trend towards female EXS receiving more extensive resections and female STS receiving less extensive resections or biopsies ( $p=0.098$ ).

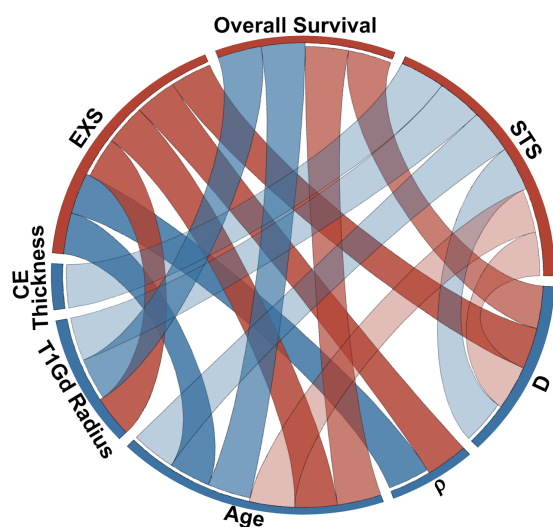

**Figure 4: Sex differences in association with EXS, STS, or overall survival<sup>(31)</sup>.** The bottom portion of the outer ring shows the relevant quantitative variables (CE thickness, T1Gd radius, age, PIHNA  $\rho$ , and PIHNA D) and the top portion shows the three aspects of survival that are associated with these variables (EXS, STS, and Overall Survival). Red ribbons indicate significant relationships for female patients and blue ribbons indicate significant relationships for male patients. Variables that were significant in multivariate CPH are connected to the Overall Survival segment and variables that were significant in t-tests are connected to the relevant EXS or STS segments.

## Patients receiving current standard of care

Due to the timespan over which they were collected, the patients in our cohort received a wide variety of treatment protocols. In order to ensure that our significant results still hold true for patients who receive the current standard of care (maximal safe resection followed by concurrent temozolomide and radiation therapy), we created a subset of patients who received this treatment protocol (Stupp protocol patients)<sup>(32)</sup> and tested which factors were associated with EXS, STS, and overall survival among those patients (**Supplement 15**). In this limited subpopulation, we had 113 males and 66 females (**Supplement 15A**). Among females, PIHNA D was a significant independent predictor of overall survival and among males, PIHNA  $\rho$  was a significant independent predictor of overall survival (**Supplement 15C**).

## Discussion

While there are no differences in the distributions of these quantitative and categorical variables between males and females, this investigation found that there are sex-specific differences in the impact that these variables have on patient survival.

## Impact of quantitative variables on survival

### Sex Differences

Among females, tumor cell diffuse invasion rate (PIHNA D) is strongly negatively correlated with overall survival for females across the various analyses. All three t-tests found that the longest-surviving females had lower mean D and the shortest-surviving females had higher mean D when compared to other survival groups (**Table 3**). Multivariate CPH analyses found that D was a significant independent predictor of survival (**Table 4B**). High PIHNA D was a highly sensitive predictor of STS in the female STS vs Non-STS DT (**Figure 3**). Notably, both when EOR was included in multivariate CPH analysis (**Supplement 14**) and when only Stupp protocol patients were considered (**Supplement 15C**), PIHNA D was still an independent predictor of survival for females. In this analysis, high PIHNA D is a predictor for short-term survival and low PIHNA D is a predictor for long-term survival among female GBM patients. The sex-specific impact of PIHNA D on patient overall survival was also shown in Yang et al.<sup>(33)</sup>, where high PIHNA D values were only associated with worse survival outcomes among females. Although it was not significant in the CPH multivariate analysis, it is notable that males had a significant positive association between overall survival and PI D/ $\rho$  in univariate analysis (**Table 4A**). This suggests that more nodular tumors at time of diagnosis are associated with worse prognosis for males, which is contrary to the finding that more diffusely invasive tumors are associated with worse prognosis for females.

Smaller total tumor size (T1Gd radius) is significantly associated with EXS for females. DT analysis showed that nodes isolating females with below average necrosis radii and CE thickness, both components of overall tumor size, were highly sensitive predictors of EXS (**Figures 1 and 2**). In the female EXS vs Non-EXS DT, T1Gd radius was a highly sensitive predictor of EXS and 81% of female EXS had a T1Gd radius below 21.93mm (**Figure 1**). Similarly, when the mean T1Gd radius of EXS was compared to the mean T1Gd radius of other survival groups, the mean radius of EXS was significantly smaller (**Table 3**). Univariate CPH found that T1Gd radius size was a significant predictor of survival (**Table 4B**), but if EXS were excluded from the analysis, this relationship is no longer significant ( $p=0.503$ ). These results suggest female extreme survivors have smaller pre-tx T1Gd radii, but T1Gd radius is not negatively correlated with overall survival for females in general.

Among males, total tumor size (T1Gd radius) is negatively correlated with overall survival across the statistical and DT analyses. EXS had a significantly smaller T1Gd radii, while STS had significantly larger T1Gd radii (**Table 3**). The pre-tx size of the T1Gd radii was a significant independent predictor of overall survival for males (**Table 4A**). Larger CE thickness, a component of the total tumor size, was associated with short-term survival for males. STS had significantly larger CE thickness than Non-STS (**Table 3**) and the male

STS vs Non-STS DT showed that above average CE thickness was a highly sensitive predictor of STS (**Figure 3**).

### Common to both sexes

Age is known to have a significant impact on the survival of glioblastoma patients<sup>(5)(6)(7)</sup> and this analysis confirmed that age significantly impacts the survival of both males and females. Across the analyses, older age at time of diagnosis is consistently associated with shorter survival, while younger age is associated with longer survival (**Table 3 and 4**).

Lower tumor cell proliferation rates (PIHNA  $\rho$ ) are associated with EXS for both males and females, but the reciprocal was not found, higher proliferation rates are not associated with shorter survival. Within both male and female populations, EXS had significantly lower  $\rho$  values than all other survival groups, but there was no significant difference in mean  $\rho$  value between STS and Non-STS (**Table 3**). Low  $\rho$  was a highly sensitive predictor of EXS in both the male and female EXS vs STS DT (**Figure 2**). In the male and female univariate CPH analyses,  $\rho$  had an almost significant impact on survival (Male  $p=0.064$ , Female  $p=0.052$ ) (**Table 4**). However, if only non-extreme survivors are considered for male and female CPH analysis populations,  $\rho$  no longer significantly impacts survival (M  $p=0.253$  and F  $p=0.194$ ). This suggests that the large number of EXS in the inclusive analysis disproportionately impacted the significance of  $\rho$ . Low tumor cell proliferation rates appear to be predictive of long-term survival for both males and females, but high rates do not appear to predict short-term survival.

### **Impact of categorical variables on survival**

#### IDH1 Mutation

While Schiffgens et al.<sup>(34)</sup> found that only IDH1 mutant males demonstrate significantly improved survival compared to IDH1 wild-type males, our investigation found the opposite, that only IDH1 mutant females demonstrate significantly improved survival when compared to their wild-type counterparts (**Supplement 1**). While our study does have a relatively small sample of IDH1 mutants, our finding is in concurrence with the findings of Yang et al.<sup>(33)</sup>, who grouped females by genetic similarities and found that the longest-living female cohort predominantly consisted of IDH1 mutant females. They did not see this effect for males. Our IDH1 mutant females were all long-term survivors and they demonstrated the same depression in PIHNA  $\rho$  when compared to the wild-type females that the EXS females demonstrated when compared to Non-EXS females. However, IDH1 mutant females did not have lower PIHNA D compared to the wild-type population. Meanwhile, IDH1 mutant males did not show improved survival, depressed PIHNA  $\rho$ , or significantly different PIHNA D when compared to IDH1 wild-type males. In Baldock et al.<sup>(17)</sup>, IDH1 mutation was shown to be significantly correlated with lower  $\rho$  and higher D/ $\rho$  (lower  $\rho$ /D) among contrast-enhancing glioma patients. The sexes were not separated in this analysis, so there is a possibility that the effect of the depressed  $\rho$  may have only existed for females. The findings of Schiffgens et al.<sup>(34)</sup>, Yang et al.<sup>(33)</sup>, and this investigation make a compelling case for the need to consider sex in IDH1-related research.

It is possible that the age difference between IDH1 mutant and wild-type patients contributed to the significant difference in overall survival that was observed between IDH1 mutant and wild-type females. However, IDH1 mutant males and females were both significantly younger than their wild-type counterparts and the significant difference in overall survival was only observed among females. It is not likely that IDH1 status alone led to the association between age and long-term survival, as it has been previously proposed<sup>(35)</sup><sup>(36)</sup>, because there was a significant negative association between age and overall survival among IDH1 wild-type patients (**Supplement 2**).

#### MGMT Methylation

Previous studies have demonstrated that MGMT promoter methylation is a significant independent prognostic factor<sup>(37)</sup> and is more common among long-term survivors<sup>(38)(30)</sup>. Despite having a relatively small

sample of patients with known MGMT methylation status, our analysis was able to confirm that, for both males and females, MGMT methylation was more common among extreme survivors and was a significant independent prognostic factor. Previous studies have also found that the survival benefit of MGMT methylation was stronger or only significant among female patients<sup>(34)(39)</sup>, but our analysis did not see any evidence of females benefiting more from MGMT methylation than males. However, our analysis did show that methylated females had some of the same characteristics as extreme surviving females, namely that methylated females had lower PIHNA D and significantly lower PIHNA  $\rho$  when compared to unmethylated females.

### Laterality

In this investigation, GBM laterality significantly impacted male survival, but had no impact on female survival. Even after accounting for EOR, males with tumors located in the left hemisphere had significantly better survival than males with tumors located in the right hemisphere. We did not consider the role of the lateralization of language dominance in this analysis, but a previous study analyzed right-handed high-grade astrocytoma patients, a group that would be predominantly left-brain dominant for language<sup>(41)</sup>, and they did not find tumor location in the dominant or non-dominant hemisphere to be a significant predictor of overall survival<sup>(42)</sup>. Ellingson et al.<sup>(40)</sup> found that patients who responded favorably to chemotherapy, patients with prolonged survival, and patients with specific genetic modifications, like MGMT promoter methylation and IDH1 mutation, had tumors that clustered in areas of the left hemisphere of the brain. Additional research will need to be conducted on the relationship between genetic modifiers, laterality, sex, and survival.

### Extent of Resection

Previous literature has identified extent of resection as a significant predictor of overall survival for GBM patients<sup>(43)(44)(6)(18)</sup>, but whether EOR has the same impact on survival for males and females has not been clearly elucidated. Our analysis found that EOR has a significant impact on the survival of male GBM patients, with a more complete resection being associated with longer survival and potentially extreme survival. Among females, there was a survival benefit associated with receiving resection, but the extent of resection did not have a significant impact on survival. These findings suggest that EOR may have a sex-specific impact on survival, but further study will be required to fully understand the extent of this difference.

### **Limitations and Further Work**

Due to the utilization of retrospective clinical data, it was not possible to control for all confounding factors and bias within our dataset. However, our utilization of a large cohort of almost 500 patients allows for the mitigation of some of these confounding effects. The findings presented in this investigation lay the groundwork for future research on the topic of sex differences in prognostic indicators of extreme survival in patients with GBM. Future work could control for course of treatment or investigate the impact of factors like radiation therapy and temozolomide dosing regimens. Considering and controlling for the impacts of other genetic modifiers, like p53 mutation, would also be necessary in future work, since these factors influence tumor behavior and survival, and potentially could be influenced by sex. Shinojima et al.<sup>(8)</sup> observed that their cohort of extreme survivors consisted entirely of females and had a disproportionately large number of giant cell glioblastoma cases. Future work could consider whether histological variations in GBM have sex-specific effects on survival. Additionally, considering more sensitive and individualized elements of the tumor, like the biological environment surrounding the tumor, could provide a more thorough understanding of what makes survival outliers unique.

### Conclusion

Taken together, these results further validate the need to consider sex as a relevant biological factor in all glioblastoma-related research. Sex has been shown to significantly impact GBM incidence and prevalence<sup>(8)(9)(10)(11)</sup>, survival<sup>(8)(13)(14)</sup>, oncogenic gene expression<sup>(33)</sup>, glycolytic pathway gene expression<sup>(45)</sup>, and



now the predictors of overall survival. Despite these findings, many studies do not specify patient sex and those that do often do not consider sex when reporting the results of their analysis. The consideration of the role of sex in tumor behavior, incidence, growth, and treatment response will only lead to higher-quality, more individualized knowledge and care for glioblastoma patients.

## References

1. Gilbert MR, Dignam JJ, Armstrong TS, Wefel JS, Blumenthal DT, Vogelbaum MA, et al. A randomized trial of bevacizumab for newly diagnosed glioblastoma. *N Engl J Med*. 2014 Feb 20;370(8):699–708.
2. Bi WL, Beroukhir R. Beating the odds: extreme long-term survival with glioblastoma. *Neuro Oncol*. 2014 Sep;16(9):1159–60.
3. Johnson DR, Leeper HE, Uhm JH. Glioblastoma survival in the United States improved after Food and Drug Administration approval of bevacizumab: a population-based analysis. *Cancer*. 2013 Oct 1;119(19):3489–95.
4. Ostrom QT, Gittleman H, Farah P, Ondracek A, Chen Y, Wolinsky Y, et al. CBTRUS statistical report: Primary brain and central nervous system tumors diagnosed in the United States in 2006-2010. *Neuro Oncol*. 2013 Nov;15 Suppl 2:ii1–56.
5. Audureau E, Chivet A, Ursu R, Corns R, Metellus P, Noel G, et al. Prognostic factors for survival in adult patients with recurrent glioblastoma: a decision-tree-based model. *J Neurooncol*. 2018 Feb;136(3):565–76.
6. Adeberg S, Bostel T, König L, Welzel T, Debus J, Combs SE. A comparison of long-term survivors and short-term survivors with glioblastoma, subventricular zone involvement: a predictive factor for survival? *Radiat Oncol*. 2014 Apr 23;9:95.
7. Chaichana K, Parker S, Olivi A, Quiñones-Hinojosa A. A proposed classification system that projects outcomes based on preoperative variables for adult patients with glioblastoma multiforme. *J Neurosurg*. 2010 May;112(5):997–1004.
8. Shinjima N, Kochi M, Hamada J-I, Nakamura H, Yano S, Makino K, et al. The influence of sex and the presence of giant cells on postoperative long-term survival in adult patients with supratentorial glioblastoma multiforme. *J Neurosurg*. 2004 Aug;101(2):219–26.
9. Brodbelt A, Greenberg D, Winters T, Williams M, Vernon S, Collins VP, et al. Glioblastoma in England: 2007-2011. *Eur J Cancer*. 2015 Mar;51(4):533–42.
10. Ho VKY, Reijneveld JC, Enting RH, Bienfait HP, Robe P, Baumert BG, et al. Changing incidence and improved survival of gliomas. *Eur J Cancer*. 2014 Sep;50(13):2309–18.
11. Dubrow R, Darefsky AS. Demographic variation in incidence of adult glioma by subtype, United States, 1992-2007. *BMC Cancer*. 2011 Jul 29;11:325.
12. Ostrom QT, Rubin JB, Lathia JD, Berens ME, Barnholtz-Sloan JS. Females have the survival advantage in glioblastoma. *Neuro Oncol*. 2018 Mar 27;20(4):576–7.
13. Babu R, Komisarow JM, Agarwal VJ, Rahimpour S, Iyer A, Britt D, et al. Glioblastoma in the elderly: the effect of aggressive and modern therapies on survival. *J Neurosurg*. 2016 Apr;124(4):998–1007.
14. Millward CP, Brodbelt AR, Haylock B, Zakaria R, Baborie A, Crooks D, et al. The impact of MGMT methylation and IDH-1 mutation on long-term outcome for glioblastoma treated with chemoradiotherapy. *Acta Neurochir*. 2016 Oct;158(10):1943–53.
15. Swanson KR, Rostomily RC, Alvord EC Jr. A mathematical modelling tool for predicting survival of individual patients following resection of glioblastoma: a proof of principle. *Br J Cancer*. 2008 Jan 15;98(1):113–9.

16. Wang CH, Rockhill JK, Mrugala M, Peacock DL, Lai A, Jusenius K, et al. Prognostic significance of growth kinetics in newly diagnosed glioblastomas revealed by combining serial imaging with a novel biomathematical model. *Cancer Res.* 2009 Dec 1;69(23):9133–40.
17. Baldock AL, Yagle K, Born DE, Ahn S, Trister AD, Neal M, et al. Invasion and proliferation kinetics in enhancing gliomas predict IDH1 mutation status. *Neuro Oncol.* 2014 Jun;16(6):779–86.
18. Baldock AL, Ahn S, Rockne R, Johnston S, Neal M, Corwin D, et al. Patient-specific metrics of invasiveness reveal significant prognostic benefit of resection in a predictable subset of gliomas. *PLoS One.* 2014 Oct 28;9(10):e99057.
19. Swanson KR. *Mathematical Modeling of the Growth and Control of Tumors.* University of Washington; 1999.
20. Rockne R, Rockhill JK, Mrugala M, Spence AM, Kalet I, Hendrickson K, et al. Predicting the efficacy of radiotherapy in individual glioblastoma patients in vivo: a mathematical modeling approach. *Phys Med Biol.* 2010 Jun 21;55(12):3271–85.
21. Neal ML, Trister AD, Ahn S, Baldock A, Bridge CA, Guyman L, et al. Response classification based on a minimal model of glioblastoma growth is prognostic for clinical outcomes and distinguishes progression from pseudoprogression. *Cancer Res.* 2013 May 15;73(10):2976–86.
22. Neal ML, Trister AD, Cloke T, Sodt R, Ahn S, Baldock AL, et al. Discriminating survival outcomes in patients with glioblastoma using a simulation-based, patient-specific response metric. *PLoS One.* 2013 Jan 23;8(1):e51951.
23. Swanson KR, Rockne RC, Claridge J, Chaplain MA, Alvord EC Jr, Anderson ARA. Quantifying the role of angiogenesis in malignant progression of gliomas: in silico modeling integrates imaging and histology. *Cancer Res.* 2011 Dec 15;71(24):7366–75.
24. Peng S, Dhruv H, Armstrong B, Salhia B, Legendre C, Kiefer J, et al. Integrated genomic analysis of survival outliers in glioblastoma. *Neuro Oncol.* 2017 Jun 1;19(6):833–44.
25. Software G. *GraphPad Prism* [Internet]. La Jolla, CA; 2016. Available from: [www.graphpad.com](http://www.graphpad.com)
26. R Core Team. *R: A language and environment for statistical computing* [Internet]. Vienna, Austria: R Foundation for Statistical Computing; 2013. Available from: <http://www.R-project.org/>
28. Therneau T, Atkinson B, Ripley B. *rpart: Recursive Partitioning and Regression Trees* [Internet]. 2017. Available from: <https://CRAN.R-project.org/package=rpart>
29. Krex D, Klink B, Hartmann C, von Deimling A, Pietsch T, Simon M, et al. Long-term survival with glioblastoma multiforme. *Brain.* 2007 Oct;130(Pt 10):2596–606.
30. Smrdel U, Popovic M, Zwitter M, Bostjancic E, Zupan A, Kovac V, et al. Long-term survival in glioblastoma: methyl guanine methyl transferase (MGMT) promoter methylation as independent favourable prognostic factor. *Radiol Oncol.* 2016 Dec 1;50(4):394–401.
31. Krzywinski M, Schein J, Birol I, Connors J, Gascoyne R, Horsman D, et al. Circos: an information aesthetic for comparative genomics. *Genome Res.* 2009 Sep;19(9):1639–45.
32. Stupp R, Mason WP, van den Bent MJ, Weller M, Fisher B, Taphoorn MJB, et al. Radiotherapy plus concomitant and adjuvant temozolomide for glioblastoma. *N Engl J Med.* 2005 Mar 10;352(10):987–96.
33. Yang W, Warrington NM, Taylor SJ, Carrasco E, Singleton KW, Wu N, et al. Clinically Important sex

differences in GBM biology revealed by analysis of male and female imaging, transcriptome and survival data. *bioRxiv*. 2017. Available from: <http://dx.doi.org/10.1101/232744>

34. Schiffgens S, Wilkens L, Brandes AA, Meier T, Franceschi E, Ermani M, et al. Sex-specific clinicopathological significance of novel (Frizzled-7) and established (MGMT, IDH1) biomarkers in glioblastoma. *Oncotarget* [Internet]. 2016;7(34). Available from: <http://dx.doi.org/10.18632/oncotarget.10465>
35. Hartmann C, Hentschel B, Simon M, Westphal M, Schackert G, Tonn JC, et al. Long-term survival in primary glioblastoma with versus without isocitrate dehydrogenase mutations. *Clin Cancer Res*. 2013 Sep 15;19(18):5146–57.
36. Hartmann C, Hentschel B, Wick W, Capper D, Felsberg J, Simon M, et al. Patients with IDH1 wild type anaplastic astrocytomas exhibit worse prognosis than IDH1-mutated glioblastomas, and IDH1 mutation status accounts for the unfavorable prognostic effect of higher age: implications for classification of gliomas. *Acta Neuropathol*. 2010 Dec;120(6):707–18.
37. Martinez R, Schackert G, Yaya-Tur R, Rojas-Marcos I, Herman JG, Esteller M. Frequent hypermethylation of the DNA repair gene MGMT in long-term survivors of glioblastoma multiforme. *J Neurooncol*. 2007 May;83(1):91–3.
38. Rivera AL, Pelloski CE, Gilbert MR, Colman H, De La Cruz C, Sulman EP, et al. MGMT promoter methylation is predictive of response to radiotherapy and prognostic in the absence of adjuvant alkylating chemotherapy for glioblastoma. *Neuro Oncol*. 2010 Feb;12(2):116–21.
39. Franceschi E, Tosoni A, Minichillo S, Depenni R, Paccapelo A, Bartolini S, et al. The Prognostic Roles of Gender and O6-Methylguanine-DNA Methyltransferase Methylation Status in Glioblastoma Patients: The Female Power. *World Neurosurg*. 2018 Apr;112:e342–7.
40. Ellingson BM, Lai A, Harris RJ, Selfridge JM, Yong WH, Das K, et al. Probabilistic radiographic atlas of glioblastoma phenotypes. *AJNR Am J Neuroradiol*. 2013 Mar;34(3):533–40.
41. Corballis MC. Left brain, right brain: facts and fantasies. *PLoS Biol*. 2014 Jan;12(1):e1001767.
42. Polin RS, Marko NF, Ammerman MD, Shaffrey ME, Huang W, Anderson FA Jr, et al. Functional outcomes and survival in patients with high-grade gliomas in dominant and nondominant hemispheres. *J Neurosurg*. 2005 Feb;102(2):276–83.
43. Orringer D, Lau D, Khatri S, Zamora-Berridi GJ, Zhang K, Wu C, et al. Extent of resection in patients with glioblastoma: limiting factors, perception of resectability, and effect on survival. *J Neurosurg*. 2012 Nov;117(5):851–9.
44. Gorlia T, van den Bent MJ, Hegi ME, Mirimanoff RO, Weller M, Cairncross JG, et al. Nomograms for predicting survival of patients with newly diagnosed glioblastoma: prognostic factor analysis of EORTC and NCIC trial 26981-22981/CE.3. *Lancet Oncol*. 2008 Jan;9(1):29–38.
45. Ippolito JE, Yim AK-Y, Luo J, Chinnaiyan P, Rubin JB. Sexual dimorphism in glioma glycolysis underlies sex differences in survival. *JCI Insight* [Internet]. 2017 Aug 3;2(15). Available from: <http://dx.doi.org/10.1172/jci.insight.92142>
